# Supplementary material for: The Importance of Fatty acid binding protein 4 (FABP4) in the diagnosis of Peripheral Arterial Disease (PAD) in the presence of Type 2 Diabetes (T2D)
Source: Research Square preprint supplement (doi:10.21203/rs.3.rs-7306668/v1), 2025-09-02
Supplement: Supplementary file 1 [file 1b9a7052cae35cb6f9504411.docx]

**CONSORT Study Checklist for Cross-Sectional Observational Trials**

(Question–Answer Format)

Q1. Does the title indicate that the study is a cross-sectional observational trial?

A: **Yes** / No

Q2. Does the abstract follow a structured format (background, objectives, methods, results, conclusion)?

A: **Yes** / No

Q3. Is the scientific background and rationale for the study clearly described?

A: **Yes** / No

Q4. Are the specific objectives and hypotheses stated explicitly?

A: **Yes** / No

Q5. Is the trial design clearly identified as a cross-sectional observational trial?

A: **Yes** / No

Q6. Are the eligibility criteria for participants clearly defined?

A: **Yes** / No

Q7. Is the setting and location of the trial mentioned?

A: **Yes** / No

Q8. Is the recruitment procedure adequately described?

A: **Yes** / No

Q9. Are the interventions described in sufficient detail (type, dose, frequency, duration)?

A: Yes / **No**

Q10. Are the primary and secondary outcomes clearly defined and explained?

A: Yes / **No**

Q11. Are the measurement tools and techniques for outcomes explained and validated?

A: **Yes** / No

Q12. Is the exact time point of outcome assessment clearly mentioned?

A: **Yes** / No

Q13. Is the sample size calculation described with justification?

A: **Yes** / No **[Already mentioned in CTRI registration. If required, It will be included in the manuscript as per requirement.]**

Q14. If randomization is used, is the sequence generation explained?

A: Yes / No / **Not Applicable**

Q15. Is allocation concealment and blinding (if any) described?

A: Yes / No / **Not Applicable**

Q16. Are the statistical methods explained, including subgroup analysis and handling of missing data?

A: **Yes** / No

Q17. Is the participant flow (number screened, enrolled, excluded, analyzed) reported clearly?

A: **Yes** / No

Q18. Is a flow diagram provided to illustrate participant inclusion and exclusion?

A: Yes / **No [Mentioned in methodology]**

Q19. Are the recruitment dates and duration mentioned?

A: **Yes** / No

Q20. Are the baseline demographic and clinical characteristics of participants presented?

A: **Yes** / No

Q21. Are the numbers analyzed for each outcome clearly reported?

A: **Yes** / No

Q22. Are the primary and secondary outcomes presented with effect sizes and confidence intervals?

A: Yes / **No**

Q23. Are any adverse events, side effects, or unintended outcomes reported?

A: Yes / **No**

Q24. Are the key findings summarized in relation to the study objectives?

A: **Yes** / No

Q25. Are the findings interpreted in the context of existing literature?

A: **Yes** / No

Q26. Are the strengths and limitations of the study discussed transparently?

A: **Yes** / No

Q27. Is the generalisability or external validity of the results addressed?

A: **Yes** / No

Q28. Is the trial registration number and registry name provided (if applicable)?

A: **Yes** / No / Not Applicable

Q29. Is the study protocol available and referenced?

A: Yes / **No**

Q30. Are the sources of funding and roles of funders declared?

A: **Yes** / No

Q31. Are conflicts of interest disclosed?

A: **Yes** / No

Q32. Is a CONSORT-style participant flow diagram included?

A: **Yes** / No

Q33. If observational elements are strong, is a STROBE checklist attached as supplementary material?

A: **Yes** / No
